# Supplementary figures and images for: Distinct mutational profile and immune microenvironment in microsatellite-unstable and POLE-mutated tumors
Source: HighWire-hosted journal article supplement (doi:10.1136/jitc-2021-002797), 2021-10-01

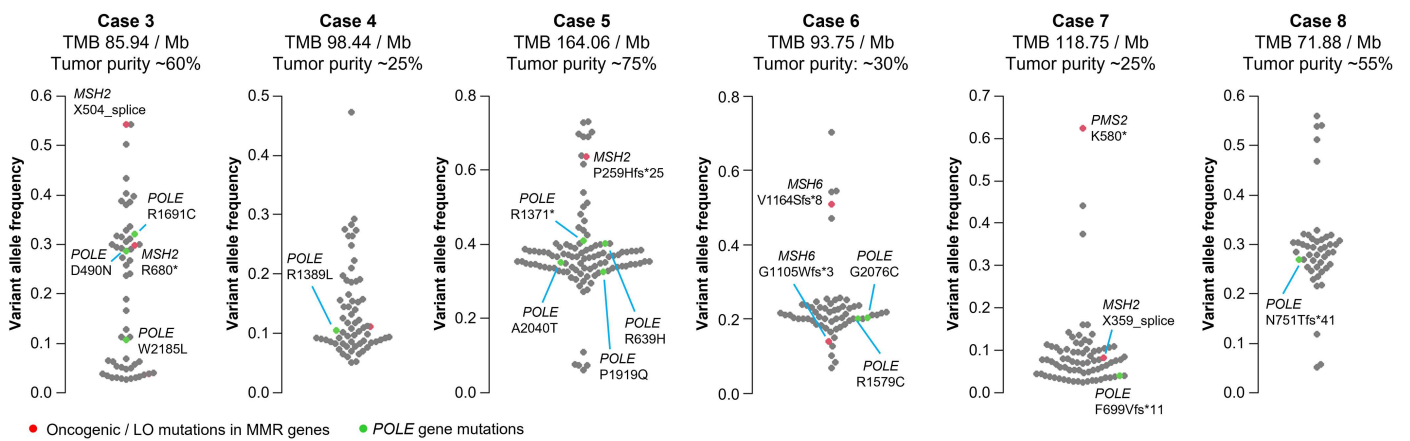

Supplement: jitc-2021-002797supp003_data_supplement.pdf [file jitc-2021-002797supp003_data_supplement.pdf]

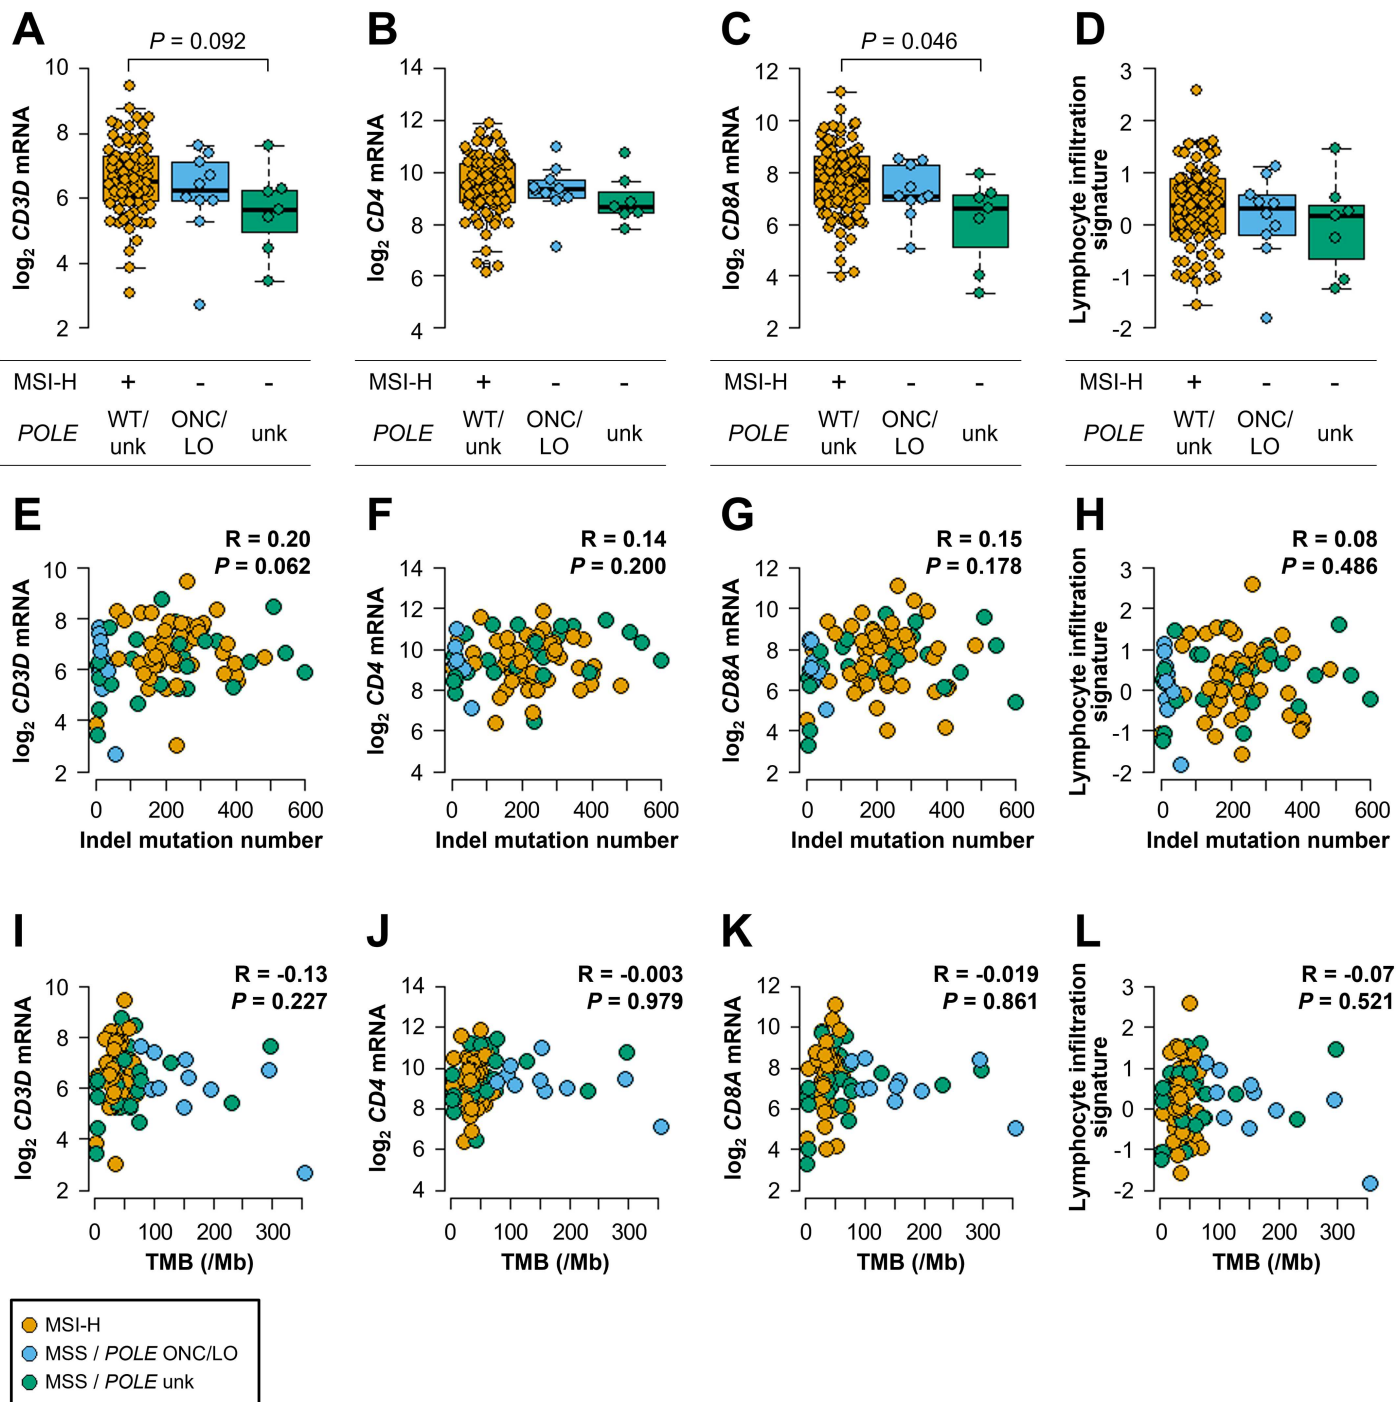

Supplement: jitc-2021-002797supp004_data_supplement.pdf [file jitc-2021-002797supp004_data_supplement.pdf]
